# Supplementary material for: Persistence of Prolonged C-peptide Production in Type 1 Diabetes as Measured With an Ultrasensitive C-peptide Assay
Source: Oxford University Press journal article supplement (doi:10.2337/dc11-1236), 2012-02-10

SUPPLEMENTARY DATA

**Supplementary Table 1.** C-peptide assay comparisons

| Method                                                              | Vendor<br>(product no.)       | Detection Range*<br>Lower limit**<br>(pmol/L) | Figures        |
|---------------------------------------------------------------------|-------------------------------|-----------------------------------------------|----------------|
| Standard Assay                                                      | Roche/Cobas<br>(03184897-190) | 370-1470<br>33.1                              | Fig. 1         |
| Regular C-peptide assay                                             | Mercodia<br>(10-1136-01)      | 95-3720                                       | Fig. 2-3,S1,S3 |
| Ultrasensitive C-peptide assay                                      | Mercodia<br>(10-1141-01)      | 5-230<br>1.5                                  | Fig1-3,S1,S3   |
| *Detection range for 5 <sup>th</sup> to 95 <sup>th</sup> percentile |                               |                                               |                |
| **Lower limit defined as last value with CV less than 1.9%          |                               |                                               |                |

**Supplementary Table 2.** Linear regression analysis of factors affecting C-peptide production by ultrasensitive assay

| Factors      | Univariate<br>Coefficient | P-value | Multivariate<br>Coefficient | P-value |
|--------------|---------------------------|---------|-----------------------------|---------|
| Duration     | -3.26                     | 0.0002* | -2.721                      | 0.005*  |
| Age          | -1.95                     | 0.020*  |                             |         |
| Age at onset | 1.37                      | 0.179   | 1.031                       | 0.331   |
| Sex          | 25.02                     | 0.391   | 40.678                      | 0.136   |
| GADA         | 0.06                      | 0.590   | -0.153                      | 0.168   |
| IA-2A        | 0.44                      | 0.007*  | 0.163                       | 0.351   |
| ZnT8A        | 0.16                      | 0.0004* | 0.127                       | 0.015*  |

## SUPPLEMENTARY DATA

**Supplementary Table 3.** Clinical characteristics of four patients whose C-peptide levels were tested weekly for up to 20 weeks.

| Patients     | #1 | #2 | #3 | #4 |
|--------------|----|----|----|----|
| Age of Onset | 30 | 10 | 21 | 2  |
| Age          | 47 | 33 | 28 | 26 |
| Duration     | 17 | 23 | 7  | 24 |
| Sex          | M  | M  | F  | M  |

SUPPLEMENTARY DATA

**Supplementary Figure 1.** C-peptide levels from 182 type 1 diabetes patients were tested (A) using Mercodia regular assay or, if negative, in the regular assay (B) were re-run using the Mercodia ultrasensitive C-peptide assay the detection limits of which are 15 and 1.5 pmol/L, respectively. Solid circles represent each individual.

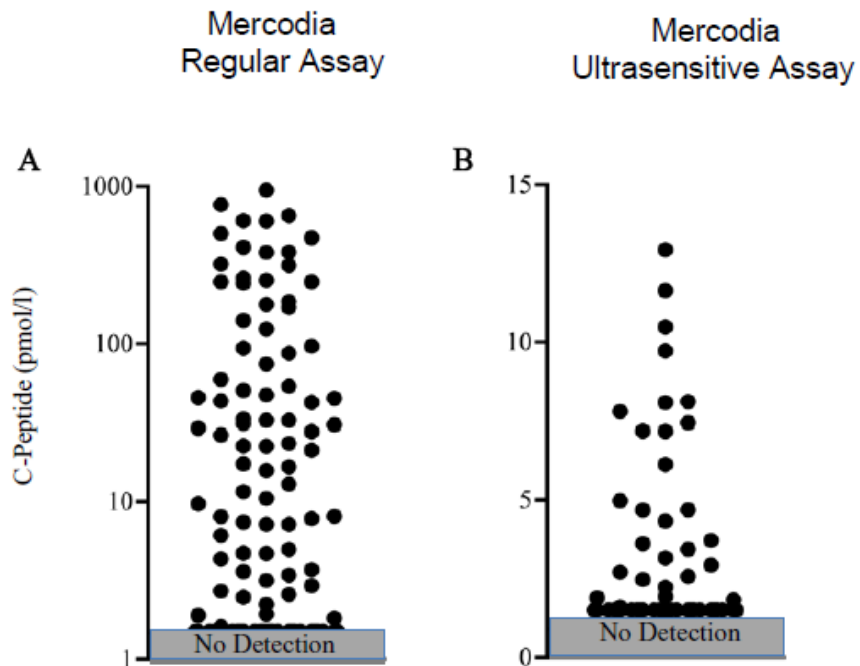

SUPPLEMENTARY DATA

**Supplementary Figure 2.** Influence of glucose on C-peptide in 3 long-term diabetic subjects followed up to 20 weeks using the Mercodia ultrasensitive assay for all values <230 pmol/L and the Mercodia regular assay for values >230pmol/l. All three long-term diabetics with different basal levels of C-peptide measured in the ultrasensitive C-peptide assay under non-fasting conditions. C-peptide levels, even at extremely low levels in subject 1 showed responsiveness to changes in glucose levels.

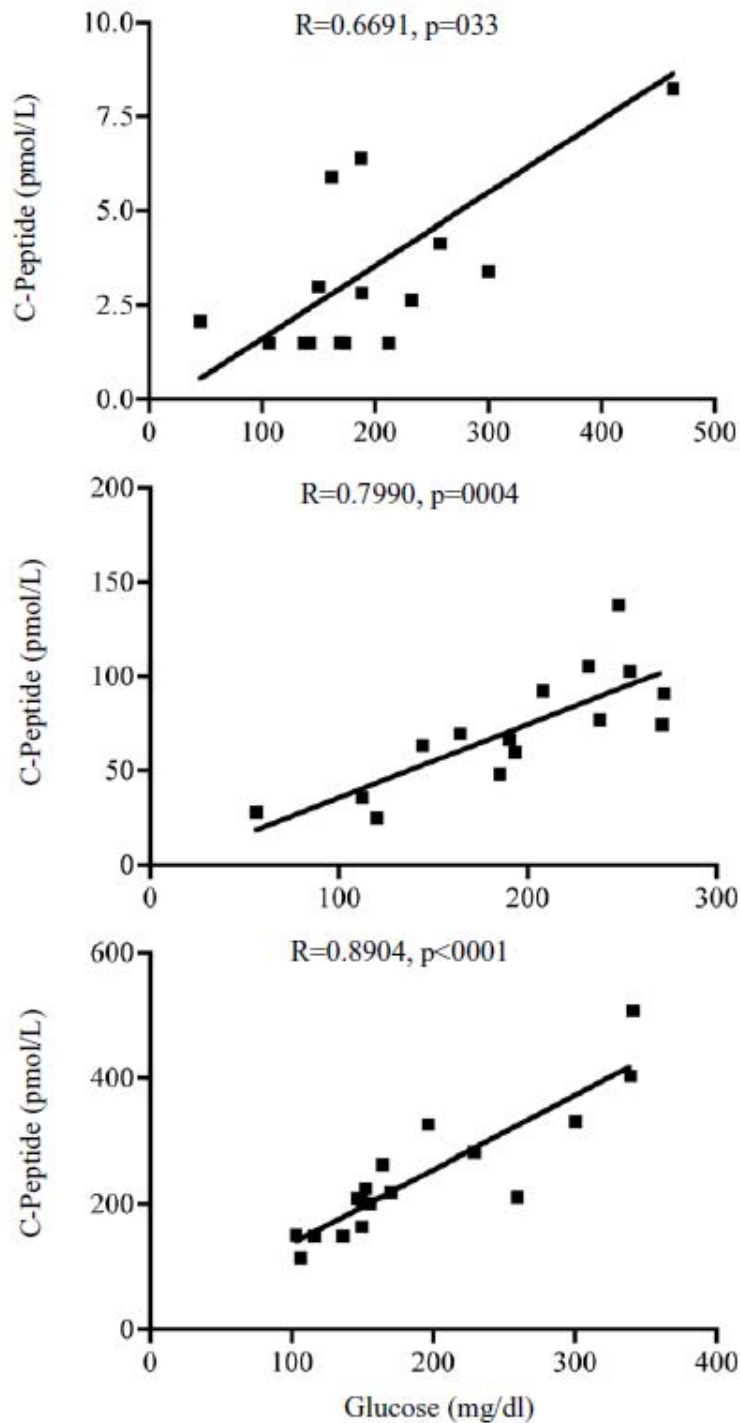

SUPPLEMENTARY DATA

**Supplementary Figure 3.** The influences on C-peptide from autoantibodies, gender and disease duration. The C-peptide levels with all the three autoantibodies tested were GADA, IA-2A and ZnT8A. A positive GADA is >43 units, IA-2A >5 units and ZnT8A >16 units. For the 182 subjects, 14% had three autoantibodies, 19% had two autoantibodies, 24% had one autoantibody and 21% had no autoantibodies. B. The influence of sex on C-peptide levels. C: Correlation between duration and age for all the 182 subjects

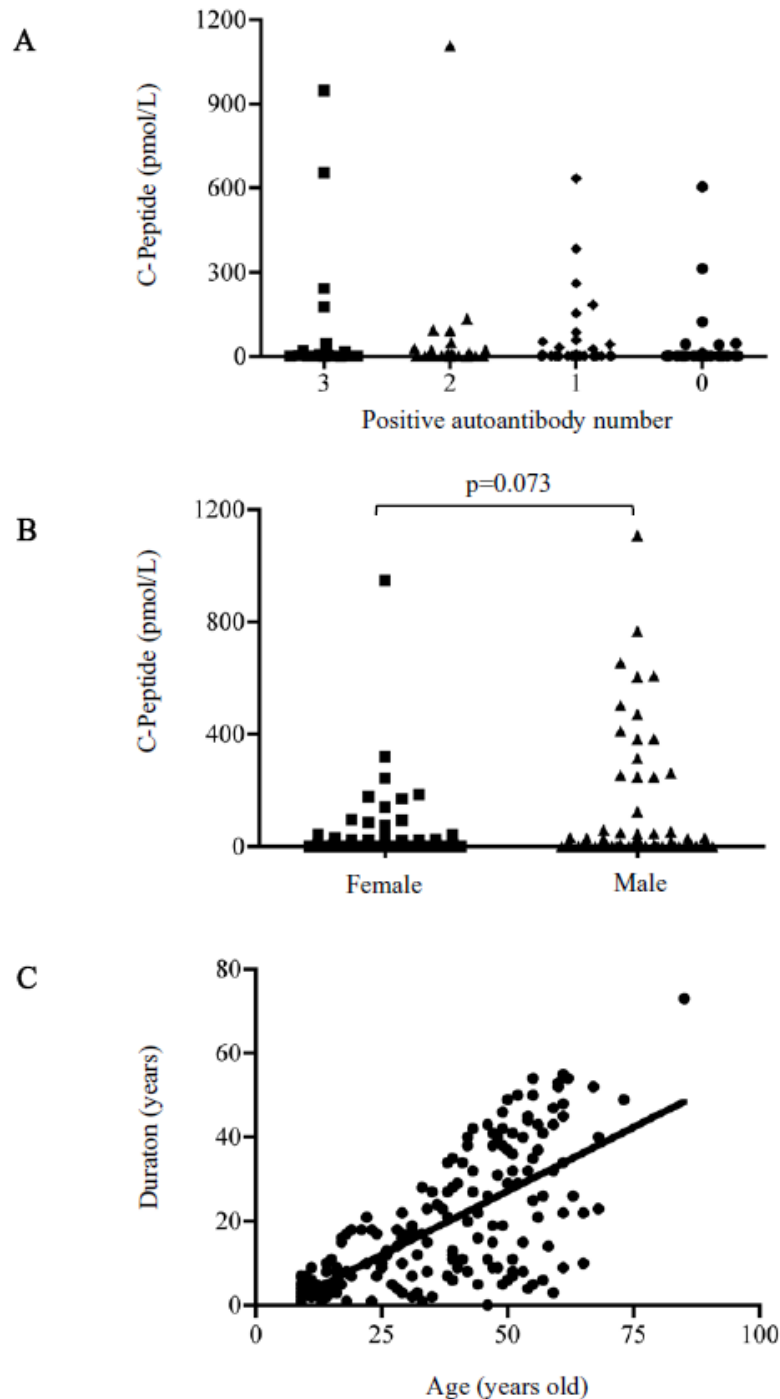

Supplement: dc111236supplementarydata.pdf [file dc111236supplementarydata.pdf]
